# Supplementary material for: Transcription Factors in Fungi: TFome Dynamics, Three Major Families, and Dual-Specificity TFs
Source: Front Genet. 2017 May 4;8:53. doi: 10.3389/fgene.2017.00053 (PMC5415576; doi:10.3389/fgene.2017.00053)
Supplement: Table S9 — List of DNA-binding domains used for the definition of TFs. [file Table9.XLSX]

## Sheet: Tabelle1
IPR ID	PFAM or SF ID	Domain name
IPR000005		Helix-turn-helix, AraC type
IPR000007	PF01167	Tub family
IPR000197	PF02135	TAZ zinc finger
IPR000232	PF00447	HSF-type DNA-binding
IPR000281	PF01418	Helix-turn-helix domain, rpiR family
IPR000327	PF00157	Pou domain - N-terminal to homeobox domain
IPR000418	PF00178	Ets-domain
IPR000524	PF00392	Bacterial regulatory proteins, gntR family
IPR000551	PF00376	MerR family regulatory protein
IPR000571	PF00642	Zinc finger, CCCH-type
IPR000679	PF00320	GATA zinc finger
IPR000770	PF01342	SAND domain
IPR000792	PF00196	Bacterial regulatory proteins, luxR family
IPR000814	PF00352	TATA-box binding
IPR000818	PF01285	TEA/ATTS domain family
IPR000831	PF01371	Trp repressor protein
IPR000835	PF01047	MarR family
IPR000843	PF00356	Bacterial regulatory proteins, lacI family
IPR000847	PF00126	Bacterial regulatory helix-turn-helix protein, lysR family
IPR000944	PF02082	Transcriptional regulator
IPR000967	PF01422	NF-X1 type zinc finger
IPR001034	PF08220	DeoR-like helix-turn-helix domain
IPR001083	PF00649	Copper fist DNA binding domain
IPR001138	PF00172	Zn cluster (Zn(2)-C6 fungal-type DNA-binding domain)
IPR001275	PF00751	DM DNA binding domain
IPR001289	PF02045	CCAAT-binding transcription factor (CBF-B/NF-YA) subunit B
IPR001346	PF00605	Interferon regulatory factor transcription factor
IPR001356	PF00046	Homeobox domain
IPR001387	PF01381	Helix-turn-helix
IPR001409	PF02155	Glucocorticoid receptor
IPR001471	PF00847	AP2 domain
IPR001523	PF00292	'Paired box' domain
IPR001628	PF00105	Zinc finger, C4 type (two domains)
IPR001699	PF00907	T-box
IPR001766	PF00250	Fork head domain
IPR001808	PF00325	Bacterial regulatory proteins, crp family
IPR001845	PF01022	Bacterial regulatory protein, arsR family
IPR001867	PF00486	Transcriptional regulatory protein, C terminal
IPR001878	PF00098	Zinc finger, CCHC-type
IPR002059	PF00313	'Cold-shock' DNA-binding domain
IPR002084	PF01340	Met Apo-repressor, MetJ
IPR002100	PF00319	SRF-type transcription factor (DNA-binding and dimerisation domain)
IPR002197	PF02954	Bacterial regulatory protein, Fis family
IPR002481	PF01475	Ferric uptake regulator family
IPR002515	PF01530	Zinc finger, C2HC type
IPR002546	PF01586	Myogenic Basic domain
IPR002577	PF01638	HxlR-like helix-turn-helix
IPR002653	PF01754	A20-like zinc finger
IPR002831	PF01978	Sugar-specific transcriptional regulator TrmB
IPR003035	PF02042	RWP-RK domain
IPR003150	PF02257	RFX DNA-binding domain
IPR003163	54616	APSES-type DNA-binding domain
IPR003174	PF02232	Alpha trans-inducing protein (Alpha-TIF)
IPR003176	PF02236	Viral DNA-binding protein, all alpha domain
IPR003316	PF02319	E2F/DP family winged-helix DNA-binding domain
IPR003340	PF02362	B3 DNA binding domain
IPR003350	PF02376	CUT domain
IPR003389	PF02456	Adenovirus IVa2 protein
IPR003441	PF02365	No apical meristem (NAM) protein
IPR003482	PF02467	Transcription factor WhiB
IPR003656	PF02892	BED zinc finger
IPR003657	PF03106	WRKY DNA -binding domain
IPR003851	PF02701	Dof domain, zinc finger
IPR003853	PF02703	Early E1A protein
IPR003902	PF03615	GCM motif protein
IPR003958	PF00808	Transcription factor CBF/NF-Y/archaeal histone domain
IPR004022	PF02791	DDT domain
IPR004181	PF02891	MIZ zinc finger
IPR004198	PF02928	C5HC2 zinc finger
IPR004210	PF02944	BESS motif
IPR004283	PF03041	lef-2
IPR004333	PF03110	SBP domain
IPR004356	PF03333	Adhesin biosynthesis transcription regulatory protein
IPR004645	89915	DNA-binding protein Tfx
IPR004823	PF02969	TATA box binding protein associated factor (TAF)
IPR004826	PF03131	bZIP Maf transcription factor
IPR004827	PF00170	bZIP transcription factor
IPR004827	PF07716	Basic region leucine zipper
IPR005011	PF03343	SART-1 family
IPR005149	PF03551	Transcriptional regulator PadR-like family
IPR005206	PF03584	Herpesvirus ICP4-like protein N-terminal region
IPR005224	PF03749	Sugar fermentation stimulation protein
IPR005333	PF03634	TCP family transcription factor
IPR005559	PF03859	CG-1 domain
IPR005569	PF03869	Arc-like DNA binding domain
IPR005650	PF03965	Penicillinase repressor
IPR005735	PF06943	LSD1 zinc finger
IPR006199	PF01726	LexA DNA binding domain
IPR006455		ZF-HD plant_spec
IPR006458	PF04844	Ovate
IPR006734	PF04640	PLATZ transcription factor
IPR006779	PF04689	DNA binding protein S1FA
IPR006780	PF04690	YABBY protein
IPR006834	PF04745	VITF-3 subunit protein
IPR006848	PF04761	Lactococcus bacteriophage putative transcription regulator
IPR006856	PF04769	Mating-type protein MAT alpha 1
IPR006923	PF04838	Baculoviridae late expression factor 5
IPR007031	PF04947	Poxvirus Late Transcription Factor VLTF3 like
IPR007050	PF04967	HTH DNA binding domain
IPR007087	PF00096	Zinc finger, C2H2 type
IPR007159	PF04014	SpoVT / AbrB like domain
IPR007168	PF04024	PspC domain
IPR007196	PF04054	CCR4-Not complex component, Not1
IPR007219	PF04082	Fungal transcription factor (Fungal_trans)
IPR007360	PF04247	Invasion gene expression up-regulator, SirB
IPR007396	PF04299	Putative FMN-binding domain
IPR007448	PF04353	Regulator of RNA polymerase sigma(70) subunit, Rsd/AlgQ
IPR007492	PF04397	LytTr DNA-binding domain
IPR007532	PF04441	Poxvirus early transcription factor (VETF), large subunit
IPR007592	PF04504	GLABROUS1 enhancer-binding protein family
IPR007604	PF04516	CP2 transcription factor
IPR007684	PF04606	Phage transcriptional activator, Ogr/Delta
IPR007737	PF05043	Mga helix-turn-helix domain
IPR007738	PF05044	Homeobox prospero-like protein (PROX1)
IPR007797	PF05110	AF-4 proto-oncoprotein
IPR007889	PF05225	helix-turn-helix, Psq domain
IPR007911		Flagellar transcriptional activator
IPR023559	PF05247	Flagellar transcriptional activator (FlhD)
IPR007944	PF05280	Flagellar transcriptional activator (FlhC)
IPR007954	PF05290	Baculovirus immediate-early protein (IE-0)
IPR007975	PF05311	Baculovirus 33KDa late protein (PP31)
IPR007985	PF05321	Haemolysin expression modulating protein
IPR008463	PF05848	Firmicute transcriptional repressor of class III stress genes (CtsR)
IPR008540	PF05687	BES1/BZR1 plant transcription factor, N-terminal
IPR008648	PF05459	Herpesvirus transcriptional regulator family
IPR008771	PF05464	Phi-29-like late genes activator (early protein GP4)
IPR008789	PF05718	Poxvirus intermediate transcription factor
IPR008807	PF05443	ROS/MUCR transcriptional regulator protein
IPR008895	PF05764	YL1 nuclear protein
IPR008917	47454	A DNA-binding domain in eukaryotic transcription factors
IPR008967	PF00870	P53 DNA-binding domain
IPR009044	54447	ssDNA-binding transcriptional regulator domain
IPR009057	PF00046	Homeobox domain
IPR009061	46955	Putative DNA-binding domain
IPR009300	PF06116	Transcriptional activator RinB
IPR009395	PF06320	GCN5-like protein 1 (GCN5L1)
IPR009508	PF06573	Churchill protein
IPR009594	PF06719	AraC-type transcriptional regulator N-terminus
IPR009638	PF06818	Fez1
IPR009986	PF07417	Transcriptional regulator Crl
IPR010312	PF06018	CodY GAF-like domain
IPR010330	PF06054	Competence protein CoiA-like family
IPR010399	PF06200	Tify plant TF
IPR010461	PF06338	ComK protein
IPR010666	PF06839	GRF zinc finger
IPR010770	PF07093	SGT1 protein
IPR010919	PF01342	SAND domain
IPR010921	PF01371	Trp repressor protein
IPR010982	PF13413	Lambda repressor-like, DNA-binding domain
IPR010985	47598	Ribbon-helix-helix
IPR011539	PF00554	Rel homology domain (RHD)
IPR011598	PF00010	Helix-loop-helix DNA-binding domain
IPR011615	PF00870	P53 DNA-binding domain
IPR011660	PF07704	Rv0623-like transcription factor
IPR011681	PF07750	GcrA cell cycle regulator
IPR011686	PF07764	Omega Transcriptional Repressor
IPR012294		Transcription factor TFIID, C-terminal/DNA glycosylase, N-terminal
IPR012340	50249	Nucleic acid-binding proteins
IPR012682	PF01056	Myc amino-terminal region
IPR012909	PF07879	PHB/PHA accumulation regulator DNA-binding domain
IPR013019	56366	SMAD MH1 domain
IPR013196	PF08279	HTH domain
IPR013198	PF08222	CodY helix-turn-helix domain
IPR013199	PF08280	M protein trans-acting positive regulator (MGA) HTH domain
IPR013236	PF08270	M protein trans-acting positive regulator (MGA) PRD domain
IPR013524	PF00853	Runt domain
IPR013742	PF08536	Whirly plant_spec_TF
IPR013801	PF02864	STAT protein, DNA binding domain
IPR013854	PF03299	Transcription factor AP-2
IPR013932	PF08623	TATA-binding protein interacting (TIP20)
IPR014855	PF08744	Plant transcription factor NOZZLE
IPR015241	PF09158	Bacteriophage T4, MotA, transcription regulator C-terminal
IPR015988	PF02864	STAT protein, DNA binding domain
IPR016032	46894	C-terminal effector domain of the bipartite response regulators
IPR016177	54171	DNA-binding domain
IPR018004	PF04383	KilA-N domain
IPR018060	PF00165	Bacterial regulatory helix-turn-helix proteins, AraC family
IPR020900	PF01316	Arginine repressor, DNA binding domain
IPR022687	PF01325	Iron dependent repressor, N-terminal DNA binding domain
IPR022793	PF05234	UAF complex subunit Rrn10
IPR024061	PF05224	NDT80 / PhoG like DNA-binding family
IPR024684	PF06069	PerC transcriptional activator
IPR025659	54518	Transcriptional factor tubby, C-terminal domain
	PF02292	APSES domain <-outdated
	PF04873	Ethylene insensitive 3
	PF12165	Alfin-like
	PF05687	BES1/BZR1
